# Supplementary material
Source: PubMed Central journal article supplement (PMC6537837)
Supplement: jamafacialplastsurg-21-206-s001.pdf [file jamafacialplastsurg-21-206-s001.pdf]

## Supplementary Online Content

Abdelwahab M, Kandathil CK, Most SP, Spataro EA. Utility of Indocyanine Green Angiography to Identify Clinical Factors Associated With Perfusion of Paramedian Forehead Flaps During Nasal Reconstruction Surgery. *JAMA Facial*. Published online January 31, 2019. doi:10.1001/jamafacial.2018.1829

### eTable 1. Univariable Linear Regression

This supplementary material has been provided by the authors to give readers additional information about their work.

**eTable 1: Univariable Linear Regression**

| Factors                  | <u>Inflow Ratio</u> |        |       | <u>Peak Ratio</u> |        |       | <u>Outflow Ratio</u> |              |              | <u>Average Ratio</u> |        |       | <u>Ingress Ratio</u> |              |              | <u>Egress Ratio</u> |        |       |
|--------------------------|---------------------|--------|-------|-------------------|--------|-------|----------------------|--------------|--------------|----------------------|--------|-------|----------------------|--------------|--------------|---------------------|--------|-------|
|                          | B                   | 95% CI |       | B                 | 95% CI |       | B                    | 95% CI       |              | B                    | 95% CI |       | B                    | 95% CI       |              | B                   | 95% CI |       |
| <b>Gender</b>            |                     |        |       |                   |        |       |                      |              |              |                      |        |       |                      |              |              |                     |        |       |
| <b>Male</b>              | ref                 | ref    | ref   | ref               | ref    | ref   | ref                  | ref          | ref          | ref                  | ref    | ref   | ref                  | ref          | ref          | ref                 | ref    | ref   |
| <b>Female</b>            | 0.087               | -0.109 | 0.283 | 0.06              | -0.104 | 0.223 | -0.024               | -0.227       | 0.18         | 0.041                | -0.128 | 0.21  | 0.075                | -0.102       | 0.252        | 0.392               | -0.11  | 0.894 |
| <b>Age</b>               | 0.005               | -0.004 | 0.013 | 0.004             | -0.004 | 0.011 | 0.004                | -0.005       | 0.013        | 0.004                | -0.003 | 0.012 | 0.004                | -0.004       | 0.012        | 0.004               | -0.02  | 0.028 |
| <b>Pathology</b>         |                     |        |       |                   |        |       |                      |              |              |                      |        |       |                      |              |              |                     |        |       |
| <b>BCC</b>               | ref                 | ref    | ref   | ref               | ref    | ref   | ref                  | ref          | ref          | ref                  | ref    | ref   | ref                  | ref          | ref          | ref                 | ref    | ref   |
| <b>SCC</b>               | -0.066              | -0.377 | 0.245 | 0.016             | -0.245 | 0.276 | 0.021                | -0.3         | 0.343        | -0.01                | -0.277 | 0.258 | 0.007                | -0.272       | 0.287        | -0.146              | -0.958 | 0.665 |
| <b>Melanoma</b>          | 0.028               | -0.325 | 0.382 | 0.034             | -0.262 | 0.329 | 0.035                | -0.33        | 0.4          | 0.032                | -0.271 | 0.336 | -0.008               | -0.352       | 0.337        | -0.119              | -1.163 | 0.924 |
| <b>Other</b>             | -0.138              | -0.625 | 0.349 | 0.057             | -0.351 | 0.464 | 0.132                | -0.371       | 0.635        | 0.017                | -0.402 | 0.435 | 0.175                | -0.262       | 0.613        | 0.256               | -0.938 | 1.449 |
| <b>Tobacco</b>           | -0.076              | -0.269 | 0.118 | 0.008             | -0.154 | 0.17  | 0.116                | -0.082       | 0.315        | 0.016                | -0.15  | 0.183 | 0.001                | -0.174       | 0.177        | -0.148              | -0.649 | 0.353 |
| <b>Radiation</b>         | -0.045              | -0.35  | 0.26  | 0.039             | -0.215 | 0.293 | 0.06                 | -0.254       | 0.374        | 0.018                | -0.243 | 0.279 | 0.079                | -0.194       | 0.353        | -0.102              | -0.85  | 0.647 |
| <b>Diabetes</b>          | -0.107              | -0.363 | 0.149 | -0.159            | -0.37  | 0.052 | -0.222               | -0.482       | 0.038        | -0.163               | -0.379 | 0.054 | -0.191               | -0.417       | 0.036        | -0.38               | -1.086 | 0.326 |
| <b>Time btwn Stages</b>  | 0.001               | -0.013 | 0.015 | 0.006             | -0.006 | 0.018 | <b>0.014</b>         | <b>0.000</b> | <b>0.028</b> | 0.007                | -0.005 | 0.019 | <b>0.015</b>         | <b>0.002</b> | <b>0.027</b> | 0.016               | -0.021 | 0.052 |
| <b>Defect depth</b>      |                     |        |       |                   |        |       |                      |              |              |                      |        |       |                      |              |              |                     |        |       |
| <b>Partial thickness</b> | ref                 | ref    | ref   | ref               | ref    | ref   | ref                  | ref          | ref          | ref                  | ref    | ref   | ref                  | ref          | ref          | ref                 | ref    | ref   |
| <b>Full thickness</b>    | -0.014              | -0.245 | 0.217 | 0.027             | -0.165 | 0.219 | 0.101                | -0.135       | 0.338        | 0.038                | -0.159 | 0.235 | 0.041                | -0.166       | 0.248        | -0.242              | -0.825 | 0.341 |
| <b>Defect area</b>       | 0.001               | -0.005 | 0.006 | 0.002             | -0.002 | 0.007 | 0.005                | -0.001       | 0.011        | 0.003                | -0.002 | 0.007 | 0.004                | -0.001       | 0.009        | -0.002              | -0.016 | 0.012 |
| <b>Cartilage Graft</b>   | -0.056              | -0.253 | 0.14  | -0.019            | -0.183 | 0.145 | -0.077               | -0.28        | 0.125        | -0.051               | -0.219 | 0.117 | 0.097                | -0.079       | 0.273        | 0.107               | -0.404 | 0.618 |
